# Supplementary material for: Towards standardized microbial hydrogen consumption testing in the subsurface: harmonized field sampling and enrichment approaches
Source: World J Microbiol Biotechnol. 2025 Sep 26;41(10):342. doi: 10.1007/s11274-025-04542-0 (PMC12464130; doi:10.1007/s11274-025-04542-0)
Supplement: Supplementary file 2 — Supplementary Material 2 [file 11274_2025_4542_MOESM2_ESM.xlsx]

## Sheet: Lab1
Calculation for H2 in mmol in headspace in bottles
Please fill in all yellow and leave everything else unchanged
										Get water vapor pressure
Total volume bottle					118	ml					water vapor pressure in Pascal
Temp during measuring					37	°C	310	K		37C	6283
Gaskonstant (J/mol K):					8.3144					30C	4248
R*T					2577.46		30C	2519.26
Absolute Pressure in bar		yellow fill in																				Amount of substance (n) H2 in [mmol]
		Incubation time [d]	0	2	2	4	4	7	7	9	9	11	11	14	pressure loss						Incubation time [d]
																						0	2	2	4	4	7	7	9	9	11	11	14	pressure loss	0	0	0	0
		sample ID	Absolute pressure [bar]																		Sterile brine + H2	4.35244	4.04378	3.7886	3.51326	3.29228	3.04957	2.86602	2.64096	-0.281271	0	0	0	0	0	0	0	0
	Sterile brine + H2	Sterile brine + H2	1.733	1.623	1.493	1.393	1.283	1.193	1.103	1.023					0.71						Sterile brine + H2	4.36527	4.04511	3.8143	3.51845	3.29489	3.04756	2.86192	2.6371	-0.283816	0	0	0	0	0	0	0	0
	Sterile brine + H2	Sterile brine + H2	1.733	1.613	1.493	1.383	1.273	1.183	1.093	1.013					0.72						Brine + H2	4.41238	3.58507	3.26592	2.41947	2.21726	1.69779	1.55731	1.37553	-0.280671	0	0	0	0	0	0	0	0
	Brine + H2	Brine + H2	1.763	1.443	1.293	0.976	0.882	0.692	0.628	0.564											Brine + H2	4.39218	3.40114	3.05165	2.3418	2.12447	1.57666	1.43693	1.16199	-0.279481	0	0	0	0	0	0	0	0
	Brine + H2	Brine + H2	1.763	1.373	1.213	0.947	0.848	0.649	0.586	0.488											Water + H2	4.47625	4.13116	3.87492	3.58043	3.33019	3.07814	2.89286	2.6746	-0.284854	0	0	0	0	0	0	0	0
	Water + H2	Water + H2	1.773	1.643	1.513	1.403	1.283	1.193	1.103	1.023					0.75						Water + H2	4.47835	4.15916	3.90339	3.58205	3.359	3.11276	2.92763	2.67579	-0.28498	0	0	0	0	0	0	0	0
	Water + H2	Water + H2	1.773	1.653	1.523	1.403	1.293	1.203	1.113	1.023					0.75						Brine + N2	0	0	0	0	0	0	0	0	0	0	0	0	0	0	0	0	0
	Brine + N2	Brine + N2	1.733	1.613	1.463	1.353	1.233	1.143	1.043	0.977					0.756						Brine + N2	0	0	0	0	0	0	0	0	0	0	0	0	0	0	0	0	0
	Brine + N2	Brine + N2	1.743	1.623	1.473	1.363	1.233	1.153	1.053	0.982					0.761						0	0	0	0	0	0	0	0	0	0	0	0	0	0	0	0	0	0
																					0	0	0	0	0	0	0	0	0	0	0	0	0	0	0	0	0	0
																					0	0	0	0	0	0	0	0	0	0	0	0	0	0	0	0	0	0
																					0	0	0	0	0	0	0	0	0	0	0	0	0	0	0	0	0	0
																					0	0	0	0	0	0	0	0	0	0	0	0	0	0	0	0	0	0
																					0	0	0	0	0	0	0	0	0	0	0	0	0	0	0	0	0	0
			Water volume in bottle [mL]																		H2 in mmol corrected for sampling loss only
		Incubation time [d]	0	2	2	4	4	7	7	9	9	11	11	14	pressure loss	0	0	0	0			0	2	4	7	9	11	14	0	0		mean 0	mean 9	% loss
		Sterile brine + H2	50	50	48.5	48.5	47	47	45.5	45.5		0		0		0		0			Sterile brine + H2	4.35244	4.04378	3.76844	3.52573	3.30067						4.35885	3.28889	0.245469
		Sterile brine + H2	50	50	48.5	48.5	47	47	45.5	45.5		0		0		0		0			Sterile brine + H2	4.36527	4.04511	3.74926	3.50193	3.27711
		Brine + H2	50	50	48.5	48.5	47	47	45.5	45.5		0		0		0		0			Brine + H2	4.41238	3.58507	2.73861	2.21915	2.03737						4.40228	1.95295	0.556377
		Brine + H2	50	50	48.5	48.5	47	47	45.5	45.5		0		0		0		0			Brine + H2	4.39218	3.40114	2.69129	2.14347	1.86853
		Water + H2	50	50	48.5	48.5	47	47	45.5	45.5		0		0		0		0			Water + H2	4.47625	4.13116	3.83667	3.58461	3.36635						4.4773	3.35305	0.2511
		Water + H2	50	50	48.5	48.5	47	47	45.5	45.5		0		0		0		0			Water + H2	4.47835	4.15916	3.83783	3.59158	3.33974
		Brine + N2	50	50	48.5	48.5	47	47	45.5	45.5		0		0		0		0			Brine + N2	0	0	0	0	0						0	0	#DIV/0!
		Brine + N2	50	50	48.5	48.5	47	47	45.5	45.5		0		0		0		0			Brine + N2	0	0	0	0	0
		0		0		0		0		0		0		0		0		0			0	0	0	0	0	0
		0		0		0		0		0		0		0		0		0			0	0	0	0	0	0
		0		0		0		0		0		0		0		0		0			0	0	0	0	0	0
		0		0		0		0		0		0		0		0		0			0	0	0	0	0	0
		0		0		0		0		0		0		0		0		0			0	0	0	0	0	0
		0		0		0		0		0		0		0		0		0			0	0	0	0	0	0
			H2 in headspace [%]
		Incubation time [d]	0	2	2	4	4	7	7	9	9	11	11	14	pressure loss	0	0	0	0		H2 in % corrected for sampling loss only				Final graph for use
		Sterile brine + H2	98.7769	98.2425	98.2425	97.9515	97.9515	97.9557	97.9557	97.7841	97.7841		0		0		0		0			0	2	4	7	9	11	14
		Sterile brine + H2	99.0682	98.9088	98.9088	98.8391	98.8391	98.7649	98.7649	98.6688	98.6688		0		0		0		0		Sterile brine + H2	0	-7.09154	-13.4177	-18.9941	-24.1651	0	0
		Brine + H2	98.3703	98.4575	98.4575	98.2598	98.2598	97.9605	97.9605	97.5754	97.5754		0		0		0		0		Sterile brine + H2	0	-7.33424	-14.1117	-19.7775	-24.9276	0	0
		Brine + H2	97.9201	98.3967	98.3967	98.2249	98.2249	97.6445	97.6445	97.1618	97.1618		0		0		0		0		Brine + H2	0	-18.7497	-37.9334	-49.7062	-53.826	0	0
		Water + H2	99.2108	99.095	99.095	99.0794	99.0794	98.8731	98.8731	99.0297	99.0297		0		0		0		0		Brine + H2	0	-22.5638	-38.7255	-51.198	-57.4577	0	0
		Water + H2	99.2572	99.1394	99.1394	99.1242	99.1242	99.1084	99.1084	99.0736	99.0736		0		0		0		0		Water + H2	0	-7.70943	-14.2883	-19.9194	-24.7954	0	0
		Brine + N2	0	0	0	0	0	0	0	0	0		0		0		0		0		Water + H2	0	-7.1272	-14.3026	-19.8011	-25.4246	0	0
		Brine + N2	0	0	0	0	0	0	0	0	0		0		0		0		0		Brine + N2
		0			0		0		0		0		0		0		0		0		Brine + N2
		0			0		0		0		0		0		0		0		0
		0			0		0		0		0		0		0		0		0
		0			0		0		0		0		0		0		0		0
		0			0		0		0		0		0		0		0		0
		0			0		0		0		0		0		0		0		0
																					Calculation of true hydrogen loss (%)
																					water loss	0	2	4	7	9	11	14	0	0
																					Water + H2	0	0.345094	0.639582	0.891641	1.1099
																					Water + H2	0	0.319181	0.640519	0.886762	1.1386
																					mean water	0	0.332137	0.640051	0.889201	1.12425											overall consumption
																																	absolute loss mmol to compare with sulphate concentration recalculations
																					H2 (mmol) corrected for water loss	0	2	4	7	9	11	14	0	0		H2 (mmol) corrected for water loss	0	2	4	7	9	mean rate
																					Sterile brine + H2	4.35244	4.37592	4.40849	4.41493	4.42492						Sterile brine + H2	0	0.0234824	0.0560527	0.0624947	0.0724833	0.0080537
																					Sterile brine + H2	4.36527	4.37725	4.38931	4.39113	4.40136						Sterile brine + H2	0	0.0119778	0.0240375	0.0258586	0.0360924	0.00401027
																					Brine + H2	4.41238	3.91721	3.37866	3.10835	3.16162						Brine + H2	0	-0.49517	-1.03371	-1.30402	-1.25075	-0.138973
																					Brine + H2	4.39218	3.73328	3.33134	3.03267	2.99279						Brine + H2	0	-0.658907	-1.06084	-1.35951	-1.3994	-0.155489
																					H2 loss corrected in %	0	2	4	7	9	11	14	0	0		period loss
																					Sterile brine + H2	0	-0.00539522	-0.0128785	-0.0143586	-0.0166535						Sterile brine + H2		0.0234824	0.0325704	0.00644196	0.00998859
																					Sterile brine + H2	0	-0.00274389	-0.00550653	-0.00592372	-0.00826809						Sterile brine + H2		0.0119778	0.0120597	0.00182112	0.0102338
																					Brine + H2	0	0.112223	0.234276	0.295538	0.283465					0.301038	Brine + H2		-0.49517	-0.538544	-0.270311	0.0532712
																					Brine + H2	0	0.150018	0.24153	0.309529	0.318611						Brine + H2		-0.658907	-0.401938	-0.298665	-0.0398879
																																daily loss (mmol)						max rate
																																Sterile brine + H2		0.0117412	0.0162852	0.00214732	0.00499429	0.00214732
																																Sterile brine + H2		0.00598891	0.00602985	0.000607039	0.0051169	0.000607039
																																Brine + H2		-0.247585	-0.269272	-0.0901038	0.0266356	-0.269272
																																Brine + H2		-0.329453	-0.200969	-0.0995549	-0.0199439	-0.329453

## Sheet: Lab2
Calculation for H2 in mmol in headspace in bottles
Please fill in all yellow and leave everything else unchanged
										Get water vapor pressure
Total volume bottle					118	ml					water vapor pressure in Pascal
Temp during measuring					37	°C	310	K		37C	6283
Gaskonstant (J/mol K):					8.3144					30C	4248
R*T					2577.46		30C	2519.26
Absolute Pressure in bar		yellow fill in																				Amount of substance (n) H2 in [mmol]
		Incubation time [d]	0	2	2	4	4	7	7	9	9	11	11	14	pressure loss						Incubation time [d]
																						0	2	2	4	4	7	7	9	9	11	11	14	pressure loss	0	0	0	0
		sample ID	Absolute pressure [bar]																		Sterile brine + H2	4.48202	4.4313	4.37978	4.38304	4.35621	4.29011	4.19694	4.13764	4.14525	0	0	0	0	0	0	0	0
	Sterile brine + H2	Sterile brine + H2	1.788	1.77	1.709	1.708	1.659	1.637	1.567	1.544	1.513				0.244						Sterile brine + H2	4.70067	4.64009	4.61246	4.60856	4.55998	4.51503	4.16506	4.12508	4.09243	0	0	0	0	0	0	0	0
	Sterile brine + H2	Sterile brine + H2	1.871	1.851	1.797	1.793	1.734	1.72	1.556	1.54	1.495				0.331						Brine + H2	4.30542	0	0	0	0	0	0	0	0	0	0	0	0	0	0	0	0
	Brine + H2	Brine + H2	1.717	1.574	1.469	1.38	1.302	1.205	1.173	1.148	1.117										Brine + H2	4.32518	3.86199	3.63565	3.35652	3.20901	2.94209	2.90458	2.81168	2.80465	0	0	0	0	0	0	0	0
	Brine + H2	Brine + H2	1.73	1.534	1.414	1.307	1.224	1.127	1.089	1.056	1.031										Water + H2	4.63794	4.61934	4.54826	4.55371	4.49859	4.45164	4.44987	4.42164	4.38808	0	0	0	0	0	0	0	0
	Water + H2	Water + H2	1.821	1.814	1.745	1.747	1.687	1.67	1.632	1.622	1.575				0.199						Water + H2	4.62475	4.61424	4.55655	4.5565	4.50976	4.48501	4.45284	4.4329	4.388	0	0	0	0	0	0	0	0
	Water + H2	Water + H2	1.816	1.812	1.748	1.748	1.691	1.682	1.633	1.626	1.575				0.19						Brine + N2	2.43028e-05	2.41973e-05	2.40721e-05	2.41802e-05	2.40497e-05	2.39666e-05	2.397e-05	2.40268e-05	2.40341e-05	0	0	0	0	0	0	0	0
	Brine + N2	Brine + N2	0.984	0.98	0.953	0.957	0.931	0.928	0.908	0.91	0.891				0.074						Brine + N2	3.56737e-05	3.57792e-05	3.54297e-05	3.55109e-05	3.51304e-05	3.51858e-05	3.48891e-05	3.46906e-05	3.45397e-05	0	0	0	0	0	0	0	0
	Brine + N2	Brine + N2	1.415	1.419	1.373	1.376	1.331	1.333	1.293	1.286	1.253				0.129						Brine + H2	4.58689	4.29643	4.09951	3.63337	3.53951	3.39587	3.03229	2.95382	2.90372	0	0	0	0	0	0	0	0
	Brine + H2	Brine + H2	1.819	1.698	1.585	1.409	1.343	1.291	1.134	1.106	1.065										Brine + H2	4.598	4.29096	4.07238	3.52548	3.45387	3.32205	3.27089	3.19788	3.0665	0	0	0	0	0	0	0	0
	Brine + H2	Brine + H2	1.825	1.696	1.575	1.369	1.312	1.264	1.218	1.192	1.121										0	0	0	0	0	0	0	0	0	0	0	0	0	0	0	0	0	0
																					0	0	0	0	0	0	0	0	0	0	0	0	0	0	0	0	0	0
																					0	0	0	0	0	0	0	0	0	0	0	0	0	0	0	0	0	0
																					0	0	0	0	0	0	0	0	0	0	0	0	0	0	0	0	0	0
			Water volume in bottle [mL]																		H2 in mmol corrected for sampling loss only
		Incubation time [d]	0	2	2	4	4	7	7	9	9	11	11	14	pressure loss	0	0	0	0			0	2	4	7	9	11	14	0	0		mean 0	mean 9	% loss
		Sterile brine + H2	50	50	48.3	48.3	46.6	46.6	44.9	44.9	43.2	43.2		0		0		0			Sterile brine + H2	4.48202	4.4313	4.43455	4.36845	4.30915						4.59134	4.4302	0.0350972
		Sterile brine + H2	50	50	48.3	48.3	46.6	46.6	44.9	44.9	43.2	43.2		0		0		0		1	Sterile brine + H2	4.70067	4.64009	4.63618	4.59123	4.55125
		Brine + H2	50	50	48.3	48.3	46.6	46.6	44.9	44.9	43.2	43.2		0		0		0		2	Brine + H2	4.30542	0	0	0	0						4.3153	1.61152	0.626557
		Brine + H2	50	50	48.3	48.3	46.6	46.6	44.9	44.9	43.2	43.2		0		0		0		3	Brine + H2	4.32518	3.86199	3.58286	3.31594	3.22304
		Water + H2	50	50	48.3	48.3	46.6	46.6	44.9	44.9	43.2	43.2		0		0		0		4	Water + H2	4.63794	4.61934	4.62479	4.57784	4.54961						4.63134	4.55956	0.0154997
		Water + H2	50	50	48.3	48.3	46.6	46.6	44.9	44.9	43.2	43.2		0		0		0		5	Water + H2	4.62475	4.61424	4.6142	4.58945	4.56951
		Brine + N2	50	50	48.3	48.3	46.6	46.6	44.9	44.9	43.2	43.2		0		0		0		6	Brine + N2	2.43028e-05	2.41973e-05	2.43054e-05	2.42223e-05	2.4279e-05						2.99882e-05	2.99981e-05	-0.000329911
		Brine + N2	50	50	48.3	48.3	46.6	46.6	44.9	44.9	43.2	43.2		0		0		0		7	Brine + N2	3.56737e-05	3.57792e-05	3.58603e-05	3.59157e-05	3.57172e-05
		Brine + H2	50	50	48.3	48.3	46.6	46.6	44.9	44.9	43.2	43.2		0		0		0		8
		Brine + H2	50	50	48.3	48.3	46.6	46.6	44.9	44.9	43.2	43.2		0		0		0				0	2	5	7	9
		0		0		0		0		0		0		0		0		0			Brine + H2	4.58689	4.29643	3.83029	3.68666	3.60819						4.59244	3.57371	0.221827
		0		0		0		0		0		0		0		0		0		3(9)	Brine + H2	4.598	4.29096	3.74407	3.61225	3.53924
		0		0		0		0		0		0		0		0		0		4(10)	0	0	0	0	0	0
		0		0		0		0		0		0		0		0		0			0	0	0	0	0	0
																					0	0	0	0	0	0
			H2 in headspace [%]																		0	0	0	0	0	0
		Incubation time [d]	0	2	2	4	4	7	7	9	9	11	11	14	pressure loss	0	0	0	0
		Sterile brine + H2	98.475	98.387	98.387	98.52	98.52	98.381	98.381	98.497	98.497		0		0		0		0
		Sterile brine + H2	98.538	98.356	98.356	98.5	98.5	98.353	98.353	98.464	98.464		0		0		0		0		H2 loss in % corrected for sampling loss only	Final graph for use
		Brine + H2	98.655		0		0		0		0		0		0		0		0			0	2	4	7	9	0	4.4302	0	0
		Brine + H2	98.335	99.502	99.502	99.763	99.763	99.802	99.802	99.82	99.82		0		0		0		0		Sterile brine + H2	0	-1.13181	-1.05915	-2.534	-3.8571
		Water + H2	99.988	99.985	99.985	99.986	99.986	99.989	99.989	99.992	99.992		0		0		0		0		Sterile brine + H2	0	-1.28875	-1.37175	-2.32797	-3.1785
		Water + H2	99.988	99.989	99.989	99.988	99.988	99.992	99.992	99.99	99.99		0		0		0		0		Brine + H2	0	-100	-100	-100	-100
		Brine + N2	0.001	0.001	0.001	0.001	0.001	0.001	0.001	0.001	0.001		0		0		0		0		Brine + H2	0	-10.7092	-17.1628	-23.3341	-25.4819
		Brine + N2	0.001	0.001	0.001	0.001	0.001	0.001	0.001	0.001	0.001		0		0		0		0		Water + H2	0	-0.40113	-0.283553	-1.29591	-1.90449
		Brine + H2	99	99.593	99.593	99.809	99.809	99.813	99.813	99.84	99.84		0		0		0		0		Water + H2	0	-0.22716	-0.228146	-0.76329	-1.19445
		Brine + H2	98.902	99.588	99.588	99.811	99.811	99.838	99.838	99.857	99.857		0		0		0		0		Brine + N2	0	-0.43423	0.0108558	-0.331101	-0.0977018
		0			0		0		0		0		0		0		0		0		Brine + N2	0	0.295821	0.523233	0.678539	0.122026
		0			0		0		0		0		0		0		0		0
		0			0		0		0		0		0		0		0		0
		0			0		0		0		0		0		0		0		0		Brine + H2	0	-6.33227	-16.4947	-19.6262	-21.3368
																					Brine + H2	0	-6.67768	-18.5719	-21.4387	-23.0266
																					Calculation of true hydrogen loss (%)
																					water loss	0	2	4	7	9	11	14	0	0
																					Water + H2	0	0.0186041	0.013151	0.0601036	0.0883291
																					Water + H2	0	0.0105056	0.0105512	0.0353002	0.0552402
																					mean water	0	0.0145549	0.0118511	0.0477019	0.0717846											overall rate
																																	absolute loss mmol to compare with sulphate concentration recalculations
																					H2 (mmol) corrected for water loss	0	2	4	7	9	11	14	0	0		H2 (mmol) corrected for water loss	0	2	4	7	9	mean rate
																					Sterile brine + H2	4.48202	4.44585	4.4464	4.41615	4.38093						Sterile brine + H2	0	-0.0361729	-0.0356203	-0.0658725	-0.101092	-0.0112324
																					Sterile brine + H2	4.70067	4.65464	4.64803	4.63894	4.62304						Sterile brine + H2	0	-0.0460249	-0.0526303	-0.0617282	-0.0776258	-0.00862509
																					Brine + H2	4.58689	4.31099	3.84214	3.73436	3.67998						Brine + H2	0	-0.275899	-0.744744	-0.85253	-0.906912	-0.100768
																					Brine + H2	4.598	4.30552	3.75592	3.65995	3.61102						Brine + H2	0	-0.292485	-0.842084	-0.938051	-0.98698	-0.109664
																					H2 loss corrected in %	0	2	4	7	9	11	14	0	0		period loss
																					Sterile brine + H2	0	0.00807067	0.00794737	0.014697	0.0225549						Sterile brine + H2		-0.0361729	0.000552635	-0.0302522	-0.0352191
																					Sterile brine + H2	0	0.00979114	0.0111963	0.0131318	0.0165138						Sterile brine + H2		-0.0460249	-0.00660541	-0.00909794	-0.0158976
																					Brine + H2	-0.065375	-0.00129314	0.107603	0.132638	0.145269						Brine + H2		-0.275899	-0.468844	-0.107786	-0.0543814
																					Brine + H2	-0.0630774	0.0045464	0.131616	0.153804	0.165116						Brine + H2		-0.292485	-0.549599	-0.0959673	-0.0489285
																																daily loss (mmol)						max rate
																																Sterile brine + H2		-0.0180865	0.000276318	-0.0100841	-0.0176096	-0.0180865
																																Sterile brine + H2		-0.0230124	-0.0033027	-0.00303265	-0.00794881	-0.0230124
																																Brine + H2		-0.13795	-0.234422	-0.0359288	-0.0271907	-0.234422
																																Brine + H2		-0.146243	-0.274799	-0.0319891	-0.0244643	-0.274799

## Sheet: Lab3
Calculation for H2 in mmol in headspace in bottles
Please fill in all yellow and leave everything else unchanged
										Get water vapor pressure
Total volume bottle					118	ml					water vapor pressure in Pascal
Temp during measuring					37	°C	310	K		37C	6283
Gaskonstant (J/mol K):					8.3144					30C	4248
R*T					2577.46		30C	2519.26
Absolute Pressure in bar		yellow fill in																				Amount of substance (n) H2 in [mmol]
		Incubation time [d]	0	2	2	4	4	7	7	9	9	11	11	14	pressure loss						Incubation time [d]
																						0	2	2	4	4	7	7	9	9	11	11	14	pressure loss	0	0	0	0
		sample ID	Absolute pressure [bar]																		Sterile brine + H2	4.62206	4.59811	4.23547	3.95324	3.6633	3.64132	3.42429	3.28082	3.29517			3.08014	0	0	0	0	0
	Sterile brine + H2	Sterile brine + H2	1.69	1.679	1.545	1.549	1.44	1.444	1.356	1.336	1.336			1.244	0.446						Sterile brine + H2	4.46656	4.36167	4.006	3.813	3.50118	3.45415	3.23564	3.1048	3.11838			2.89832	0	0	0	0	0
	Sterile brine + H2	Sterile brine + H2	1.66	1.652	1.516	1.518	1.399	1.399	1.309	1.289	1.289			1.195	0.465						Brine + H2	4.41708	3.64659	3.2838	2.71816	2.51942	2.03336	1.98197	1.7616	1.79404	1.78024	1.70792	1.53801	0	0	0	0	0
	Brine + H2	Brine + H2	1.685	1.472	1.308	1.157	1.077	1.104	1.059	1.123	1.123	1.146	1.102	1.114							Brine + H2	4.39993	3.56542	3.40286	2.83604	2.62813	2.08894	2.03413	1.82683	1.86047	1.51316	1.44576	1.67788	0	0	0	0	0
	Brine + H2	Brine + H2	1.682	1.433	1.346	1.195	1.112	1.127	1.08	1.152	1.152	1.073	1.028	1.168							Water + H2	4.51152	4.42533	4.00238	3.85661	3.52632	3.48747	3.26611	3.14933	3.16311			2.95	0	0	0	0	0
	Water + H2	Water + H2	1.661	1.65	1.492	1.499	1.376	1.38	1.291	1.271	1.271			1.182	0.479						Water + H2	4.47549	4.36106	3.95932	3.84318	3.50752	3.44849	3.21249	3.09625	3.10979			2.89355	0	0	0	0	0
	Water + H2	Water + H2	1.649	1.634	1.483	1.494	1.369	1.373	1.278	1.257	1.257			1.163	0.486						Brine + N2	0	0.00113751	0.00106423	0.00101719	0.000932872	0.000870718	0.000826835	0.0801062	0.0815813	0	0	0	0	0	0	0	0
	Brine + N2	Brine + N2	1.745	1.734	1.597	1.607	1.479	1.477	1.381	1.361	1.361			1.271	0.474						Brine + N2	0	0	0	0	0	0	0	0	0	0	0	0	0	0	0	0	0
	Brine + N2	Brine + N2	1.83	1.84	1.683	1.689	1.559	1.563	1.453	1.432	1.432			1.337	0.493						0	0	0	0	0	0	0	0	0	0	0	0	0	0	0	0	0	0
																					0	0	0	0	0	0	0	0	0	0	0	0	0	0	0	0	0	0
																					0	0	0	0	0	0	0	0	0	0	0	0	0	0	0	0	0	0
																					0	0	0	0	0	0	0	0	0	0	0	0	0	0	0	0	0	0
																					0	0	0	0	0	0	0	0	0	0	0	0	0	0	0	0	0	0
																					0	0	0	0	0	0	0	0	0	0	0	0	0	0	0	0	0	0
			Water volume in bottle [mL]																		H2 in mmol corrected for sampling loss only
		Incubation time [d]	0	2	2	4	4	7	7	9	9	11	11	14	pressure loss	0	0	0	0			0	2	4	7	9	11	14	0	0		mean 0	mean 9	% loss
		Sterile brine + H2	50	50	49.7	49.7	49.7	49.7	49.4	49.4	49.1	47.8	47.8	47.8		0		0			Sterile brine + H2	4.62206	4.59811	4.31587	4.2939	4.15042		3.9354				4.54431	4.07061	0.10424
		Sterile brine + H2	50	50	49.7	49.7	49.7	49.7	49.4	49.4	49.1	47.8	47.8	47.8		0		0			Sterile brine + H2	4.46656	4.36167	4.16867	4.12164	3.9908		3.77075
		Brine + H2	50	50	48.7	48.7	48.7	48.7	47.4	47.4	46.1	45.1	45.1	45.1		0		0			Brine + H2	4.41708	3.64659	3.08095	2.59489	2.37452	2.36072	2.1908				4.40851	2.31331	0.475263
		Brine + H2	50	50	48.7	48.7	48.7	48.7	47.4	47.4	46.1	44.8	44.8	44.8		0		0			Brine + H2	4.39993	3.56542	2.9986	2.4594	2.2521	1.9048	2.13692
		Water + H2	50	50	49.7	49.7	49.7	49.7	49.4	49.4	49.1	47.8	47.8	47.8		0		0			Water + H2	4.51152	4.42533	4.27957	4.24073	4.12395		3.91085				4.4935	4.0968	0.088284
		Water + H2	50	50	49.7	49.7	49.7	49.7	49.4	49.4	49.1	47.8	47.8	47.8		0		0			Water + H2	4.47549	4.36106	4.24492	4.1859	4.06965		3.85341
		Brine + N2	50	50	48.7	48.7	48.7	48.7	47.4	47.4	46.1	44.8	44.8	44.8		0		0			Brine + N2	0	0.00113751	0.00109048	0.00102832	0.0803077	-0.00127356	-0.00127356				0	0.0401539	#DIV/0!
		Brine + N2	50	50	48.7	48.7	48.7	48.7	47.4	47.4	46.1	44.8	44.8	44.8		0		0			Brine + N2	0	0	0	0	0	0	0
		0		0		0		0		0		0		0		0		0			0	0	0	0	0	0	0	0
		0		0		0		0		0		0		0		0		0			0	0	0	0	0	0	0	0
		0		0		0		0		0		0		0		0		0			0	0	0	0	0	0	0	0
		0		0		0		0		0		0		0		0		0			0	0	0	0	0	0	0	0
		0		0		0		0		0		0		0		0		0			0	0	0	0	0	0	0	0
		0		0		0		0		0		0		0		0		0			0	0	0	0	0	0	0	0
			H2 in headspace [%]
	T0-10%	Incubation time [d]	0	2	2	4	4	7	7	9	9	11	11	14	pressure loss	0	0	0	0		H2 loss in % corrected for sampling loss only				Final graph for use
	96.9011	Sterile brine + H2	107.668	107.839	107.839	100.382	100.382	99.491	99.491	96.8198	96.8198		0	95.7445	0		0		0			0	2	4	7	9	11	14
	95.4	Sterile brine + H2	106	104.032	104.032	98.8837	98.8837	97.5554	97.5554	95.1374	95.1374		0	93.992	0		0		0		Sterile brine + H2	0	-0.51818	-6.62447	-7.09988	-10.204	-100	-14.8561
	92.8893	Brine + H2	103.21	98.0861	98.0861	92.3952	92.3952	72.6361	72.6361	60.6625	60.6625	58.1094	58.1094	51.731	0		0		0		Sterile brine + H2	0	-2.34838	-6.66936	-7.72233	-10.6517	-100	-15.5783
	92.7	Brine + H2	103	98.6324	98.6324	93.1666	93.1666	73.0086	73.0086	61.2336	61.2336	52.744	52.744	53.458	0		0		0		Brine + H2	0	-17.4435	-30.2492	-41.2533	-46.2424	-46.5549	-50.4016
	96.3	Water + H2	107	105.683	105.683	101.338	101.338	99.9174	99.9174	97.9398	97.9398		0	96.7792	0		0		0		Brine + H2	0	-18.9665	-31.849	-44.1036	-48.8152	-56.7085	-51.433
	96.2536	Water + H2	106.948	105.209	105.209	101.338	101.338	99.3284	99.3284	97.4177	97.4177		0	96.5665	0		0		0		Water + H2	0	-1.91038	-5.14134	-6.0023	-8.59074	-100	-13.3143	<10% loss after 9 days
	0	Brine + N2	0	0.0258	0.0258	0.0245	0.0245	0.0229	0.0229	2.2528	2.2528		0	0	0		0		0		Water + H2	0	-2.55678	-5.15177	-6.47061	-9.06798	-100	-13.8996	<10% loss after 9 days
	0	Brine + N2	0	0	0	0	0	0	0	0	0		0	0	0		0		0		Brine + N2
		0			0		0		0		0		0		0		0		0		Brine + N2
		0			0		0		0		0		0		0		0		0
		0			0		0		0		0		0		0		0		0
		0			0		0		0		0		0		0		0		0
		0			0		0		0		0		0		0		0		0
		0			0		0		0		0		0		0		0		0
																					Calculation of true hydrogen loss (%)
																					water loss	0	2	4	7	9	11	14	0	0
																					Water + H2	0	0.0861871	0.231953	0.270795	0.387573
																					Water + H2	0	0.114428	0.230567	0.289591	0.405836
																					mean water	0	0.100308	0.23126	0.280193	0.396705											overall rate
																																	absolute loss mmol to compare with sulphate concentration recalculations
																					H2 (mmol) corrected for water loss	0	2	4	7	9	11	14	0	0		H2 (mmol) corrected for water loss	0	2	4	7	9	mean rate			0
																					Sterile brine + H2	4.62206	4.69842	4.54713	4.57409	4.54713						Sterile brine + H2	0	0.0763571	-0.0749273	-0.0479675	-0.0749315	-0.00832572
																					Sterile brine + H2	4.46656	4.46198	4.39993	4.40183	4.3875						Sterile brine + H2	0	-0.00458404	-0.0666316	-0.0647292	-0.0790582	-0.00878425
																					Brine + H2	4.41708	3.7469	3.31221	2.87508	2.77122						Brine + H2	0	-0.670185	-1.10487	-1.542	-1.64586	-0.182873
																					Brine + H2	4.39993	3.66572	3.22986	2.7396	2.6488						Brine + H2	0	-0.734207	-1.17008	-1.66033	-1.75113	-0.19457
																					H2 loss corrected in %	0	2	4	7	9	11	14	0	0		period loss (mmol)
																					Sterile brine + H2	0	-0.0165202	0.0162108	0.0103779	0.0162117						Sterile brine + H2		0.0763571	-0.151284	0.0269599	-0.026964
																					Sterile brine + H2	0	0.0010263	0.0149179	0.0144919	0.0177						Sterile brine + H2		-0.00458404	-0.0620476	0.00190243	-0.014329
																					Brine + H2	0	0.151726	0.250137	0.349099	0.372612						Brine + H2		-0.670185	-0.43469	-0.437125	-0.103861
																					Brine + H2	0	0.166868	0.265931	0.377354	0.39799						Brine + H2		-0.734207	-0.43587	-0.490257	-0.0907954
																																daily loss (mmol)						max rate
																																Sterile brine + H2		0.0381786	-0.0756422	0.00898662	-0.013482	-0.0756422
																																Sterile brine + H2		-0.00229202	-0.0310238	0.000634143	-0.00716452	-0.0310238
																																Brine + H2		-0.335092	-0.217345	-0.145708	-0.0519303	-0.335092
																																Brine + H2		-0.367104	-0.217935	-0.163419	-0.0453977	-0.367104

## Sheet: Lab4
Calculation for H2 in mmol in headspace in bottles
Please fill in all yellow and leave everything else unchanged
										Get water vapor pressure
Total volume bottle					118	ml					water vapor pressure in Pascal
Temp during measuring					37	°C	310	K		37C	6283
Gaskonstant (J/mol K):					8.3144					30C	4248
R*T					2577.46		30C	2519.26
Absolute Pressure in bar		yellow fill in																				Amount of substance (n) H2 in [mmol]
		Incubation time [d]	0	2	2	4	4	7	7	9	9	11	11	14	pressure loss						Incubation time [d]
																						0	2	2	4	4	7	7	9	9	11	11	14	pressure loss	0	0	0	0
		sample ID	Absolute pressure [bar]																		Sterile brine + H2	5.1858	5.25542	5.11047	5.15222	4.99154	4.88958	4.74229	4.76255	7.75841	0	0	0	0	0	0	0	0
	Sterile brine + H2	Sterile brine + H2	1.973	1.978	1.917	1.926	1.86	1.868	1.806	1.825	1.739				0.148						Sterile brine + H2	5.12665	4.86017	4.75442	4.83225	4.65172	4.77304	4.58191	4.7277	7.70443	0	0	0	0	0	0	0	0
	Sterile brine + H2	Sterile brine + H2	1.915	1.905	1.857	1.867	1.792	1.804	1.727	1.755	1.673				0.16						Brine + H2	4.96454	3.49156	3.42874	2.6635	2.56013	2.4763	2.46728	2.36402	3.65651	0	0	0	0	0	0	0	0
	Brine + H2	Brine + H2	1.902	1.436	1.386	1.16	1.098	1.402	1.373	1.401	1.324										Brine + H2	4.91094	3.55974	3.51884	2.76712	2.63112	1.75908	1.76395	1.76238	2.70338	0	0	0	0	0	0	0	0
	Brine + H2	Brine + H2	1.892	1.428	1.387	1.158	1.085	1.43	1.409	1.425	1.336										Water + H2	4.93065	4.83028	4.71414	4.89877	4.73603	4.76335	4.64291	4.5403	7.46576	0	0	0	0	0	0	0	0
	Water + H2	Water + H2	1.887	1.863	1.812	1.852	1.785	1.79	1.739	1.768	1.7				0.119						Water + H2	4.78295	4.93291	4.92737	4.79701	4.66148	4.89232	4.64806	4.4247	7.27	0	0	0	0	0	0	0	0
	Water + H2	Water + H2	1.868	1.878	1.868	1.878	1.819	1.82	1.725	1.712	1.645				0.156						Brine + N2	0	0	0	0	0	0	0	0	0	0	0	0	0	0	0	0	0
	Brine + N2	Brine + N2	1.948	1.926	1.83	1.878	1.775	1.795	1.705	1.738	1.643				0.21						Brine + N2	0	0	0	0	0	0	0	0	0	0	0	0	0	0	0	0	0
	Brine + N2	Brine + N2	1.965	1.931	1.869	1.887	1.773	1.805	1.713	1.764	1.655				0.201						0	0	0	0	0	0	0	0	0	0	0	0	0	0	0	0	0	0
																					0	0	0	0	0	0	0	0	0	0	0	0	0	0	0	0	0	0
																					0	0	0	0	0	0	0	0	0	0	0	0	0	0	0	0	0	0
																					0	0	0	0	0	0	0	0	0	0	0	0	0	0	0	0	0	0
																					0	0	0	0	0	0	0	0	0	0	0	0	0	0	0	0	0	0
																					0	0	0	0	0	0	0	0	0	0	0	0	0	0	0	0	0	0
			Water volume in bottle [mL]																		H2 in mmol corrected for sampling loss only
		Incubation time [d]	0	2	2	4	4	7	7	9	9	11	11	14	pressure loss	0	0	0	0			0	2	4	7	9	11	14	0	0		mean 0	mean 9	% loss
		Sterile brine + H2	50	50	49.7	49.7	49.4	49.4	49.1	49.1		0		0		0		0			Sterile brine + H2	5.1858	5.25542	5.29716	5.1952	5.21546	-2.54295	-2.54295	-2.54295	-2.54295		5.15623	5.21029	-0.0104856
		Sterile brine + H2	50	50	49.7	49.7	49.4	49.4	49.1	49.1		0		0		0		0			Sterile brine + H2	5.12665	4.86017	4.93801	5.05933	5.20512	-2.49931	-2.49931	-2.49931	-2.49931
		Brine + H2	50	50	48.7	48.7	47.4	47.4	46.1	46.1		0		0		0		0			Brine + H2	4.96454	3.49156	2.72632	2.64248	2.53922	-1.11729	-1.11729	-1.11729	-1.11729		4.93774	2.23681	0.546997
		Brine + H2	50	50	48.7	48.7	47.4	47.4	46.1	46.1		0		0		0		0			Brine + H2	4.91094	3.55974	2.80802	1.93597	1.9344	-0.768979	-0.768979	-0.768979	-0.768979
		Water + H2	50	50	49.7	49.7	49.4	49.4	49.1	49.1		0		0		0		0			Water + H2	4.93065	4.83028	5.01491	5.04222	4.93962	-2.52614	-2.52614	-2.52614	-2.52614		4.8568	4.87482	-0.00371081
		Water + H2	50	50	49.7	49.7	49.4	49.4	49.1	49.1		0		0		0		0			Water + H2	4.78295	4.93291	4.80255	5.03339	4.81003	-2.45997	-2.45997	-2.45997	-2.45997
		Brine + N2	50	50	48.7	48.7	47.4	47.4	46.1	46.1		0		0		0		0			Brine + N2	0	0	0	0	0	0	0	0	0		0	0	#DIV/0!
		Brine + N2	50	50	48.7	48.7	47.4	47.4	46.1	46.1		0		0		0		0			Brine + N2	0	0	0	0	0	0	0	0	0
		0		0		0		0		0		0		0		0		0			0	0	0	0	0	0	0	0	0	0
		0		0		0		0		0		0		0		0		0			0	0	0	0	0	0	0	0	0	0
		0		0		0		0		0		0		0		0		0			0	0	0	0	0	0	0	0	0	0
		0		0		0		0		0		0		0		0		0			0	0	0	0	0	0	0	0	0	0
		0		0		0		0		0		0		0		0		0			0	0	0	0	0	0	0	0	0	0
		0		0		0		0		0		0		0		0		0			0	0	0	0	0	0	0	0	0	0
			H2 in headspace [%]
		Incubation time [d]	0	2	2	4	4	7	7	9	9	11	11	14	pressure loss	0	0	0	0		H2 in % corrected for sampling loss only				Final graph for use
		Sterile brine + H2	102.903	104.012	104.012	104.355	104.355	101.771	101.771	101.103	101.103		0		0		0		0			0	2	4	7	9	11	14
		Sterile brine + H2	104.915	100.001	100.001	101.075	101.075	102.996	102.996	104.515	104.515		0		0		0		0		Sterile brine + H2	0	1.34249	2.14749	0.181407	0.572023	-49.0367	-49.0367
		Brine + H2	102.315	96.3781	96.3781	90.2898	90.2898	67.508	67.508	63.3291	63.3291		0		0		0		0		Sterile brine + H2	0	-5.19795	-3.67967	-1.3132	1.5306	-48.7513	-48.7513
		Brine + H2	101.764	98.8361	98.8361	93.9735	93.9735	46.9732	46.9732	46.38	46.38		0		0		0		0		Brine + H2	0	-29.6701	-45.0842	-46.7729	-48.8529	-22.5054	-22.5054
		Water + H2	102.452	101.705	101.705	103.325	103.325	103.621	103.621	99.6072	99.6072		0		0		0		0		Brine + H2	0	-27.514	-42.8212	-60.5783	-60.6104	-15.6585	-15.6585
		Water + H2	100.43	103.008	103.008	99.7299	99.7299	104.609	104.609	100.367	100.367		0		0		0		0		Water + H2	0	-2.03559	1.70884	2.26284	0.181845	-51.2335	-51.2335
		Brine + N2	0	0	0	0	0	0	0	0	0		0		0		0		0		Water + H2	0	3.13519	0.409659	5.23593	0.566161	-51.432	-51.432
		Brine + N2	0	0	0	0	0	0	0	0	0		0		0		0		0		Brine + N2
		0			0		0		0		0		0		0		0		0		Brine + N2
		0			0		0		0		0		0		0		0		0
		0			0		0		0		0		0		0		0		0
		0			0		0		0		0		0		0		0		0
		0			0		0		0		0		0		0		0		0
		0			0		0		0		0		0		0		0		0
																					Calculation of true hydrogen loss (%)
																					water loss	0	2	4	7	9	11	14	0	0
																					Water + H2	0	0.100368	-0.0842567	-0.111573	-0.00896612
																					Water + H2	0	-0.149955	-0.0195938	-0.250432	-0.0270792
																					mean water	0	-0.0247934	-0.0519253	-0.181003	-0.0180227											overall rate
																																	absolute loss mmol to compare with sulphate concentration recalculations
																					H2 (mmol) corrected for water loss	0	2	4	7	9	11	14	0	0		H2 (mmol) corrected for water loss	0	2	4	7	9	mean rate
																					Sterile brine + H2	5.1858	5.23062	5.24524	5.0142	5.19744						Sterile brine + H2	0	0.0448256	0.0594391	-0.171595	0.0116413	0.00129348
																					Sterile brine + H2	5.12665	4.83538	4.88608	4.87833	5.1871						Sterile brine + H2	0	-0.291274	-0.240569	-0.248326	0.0604461	0.00671623
																					Brine + H2	4.96454	3.46676	2.67439	2.46148	2.5212						Brine + H2	0	-1.49778	-2.29015	-2.50306	-2.44334	-0.271483
																					Brine + H2	4.91094	3.53495	2.75609	1.75497	1.91638						Brine + H2	0	-1.37599	-2.15485	-3.15597	-2.99456	-0.332729
																					H2 loss corrected in %	0	2	4	7	9	11	14	0	0		period loss
																					Sterile brine + H2	0	-0.00864392	-0.0114619	0.0330894	-0.00224485						Sterile brine + H2		0.0448256	0.0146134	-0.231034	0.183236
																					Sterile brine + H2	0	0.0568156	0.0469252	0.0484382	-0.0117905						Sterile brine + H2		-0.291274	0.0507047	-0.00775639	0.308772
																					Brine + H2	0	0.301695	0.461301	0.504188	0.492159						Brine + H2		-1.49778	-0.792368	-0.212913	0.0597156
																					Brine + H2	0	0.280189	0.438786	0.64264	0.609774						Brine + H2		-1.37599	-0.778859	-1.00112	0.161405
																																daily loss (mmol)						max rate
																																Sterile brine + H2		0.0224128	0.00730672	-0.0770114	0.0916182	-0.0770114
																																Sterile brine + H2		-0.145637	0.0253524	-0.00258546	0.154386	-0.145637
																																Brine + H2		-0.74889	-0.396184	-0.070971	0.0298578	-0.74889
																																Brine + H2		-0.687996	-0.389429	-0.333706	0.0807023	-0.687996
